## Correction: Nucleolin represses transcription of the androgen receptor gene through a G-quadruplex

Cindy K. Miranti<sup>1,2</sup>, Sara Moore<sup>3</sup>, Yongeun Kim<sup>4</sup>, Venkateshwar Reddy Chappeta<sup>4</sup>, Kui Wu<sup>4</sup>, Biswanath De<sup>4</sup>, Vijay Gokhale<sup>5</sup>, Laurence H. Hurley<sup>1,4,5</sup> and Elsa M. Reyes-Reyes<sup>1,2,3</sup>

<sup>1</sup>University of Arizona Cancer Center, University of Arizona, Tucson, AZ 85724, USA

<sup>2</sup>Department of Cellular and Molecular Medicine, Tucson, AZ 85724, USA

<sup>3</sup>University of Arizona College of Medicine, Division of Pulmonary, Allergy, Critical Care, and Sleep Medicine, Tucson, AZ 85724, USA

<sup>4</sup>College of Pharmacy, University of Arizona, Tucson, AZ 85724, USA

<sup>5</sup>BIO5 Institute, University of Arizona, Tucson, AZ 85724, USA

**Published:** June 30, 2020

**Copyright:** Miranti et al. This is an open-access article distributed under the terms of the Creative Commons Attribution License 3.0 (CC BY 3.0), which permits unrestricted use, distribution, and reproduction in any medium, provided the original author and source are credited.

**This article has been corrected:** The Acknowledgements section has been updated as follows:

### ACKNOWLEDGMENTS

These studies were supported by funds from IRG-16-124-37 from the American Cancer Society and University of Arizona Career Development Award to EMRR and by NIH award R01CA177585 to L.H.H.

Original article: Oncotarget. 2020; 11:1758–1776. <https://doi.org/10.18632/oncotarget.27589>
